# Supplementary material
Source: Research Square preprint supplement (doi:10.21203/rs.3.rs-8712699/v1)
Supplement: Supplementary file 1 [file 7446d18332e5d2ae01dcee70.docx]

**Table 1S.** Factors associated with physiotherapy utilization after breast-cancer surgery.

| Variable | OR (Exp(B)) | 95% CI for OR | p-value |
| --- | --- | --- | --- |
| QuickDASH ≥20 | 0.68 | 0.48–0.95 | 0.025 |
| ROM limitation | 1.13 | 0.84–1.53 | 0.425 |
| Lymphedema | 0.84 | 0.52–1.35 | 0.467 |
| Pain ≥1 | 2.32 | 1.69–3.18 | <0.001 |
| Insomnia | 0.75 | 0.56–0.98 | 0.038 |
| Physical activity score (per point) | 1.02 | 1.00–1.04 | 0.023 |
| Chemotherapy | 0.66 | 0.49–0.89 | 0.007 |
| Anxiety (per point) | 0.94 | 0.90–0.99 | 0.013 |

**Abbreviations:** OR, odds ratio; CI, confidence interval; PT, physiotherapy.

**Notes:** Multivariable logistic regression model with physiotherapy utilization (yes/no) as the dependent variable. OR > 1 indicates increased odds of attending physiotherapy.
