# Supplementary material
Source: Research Square preprint supplement (doi:10.21203/rs.3.rs-8712699/v1)
Supplement: Supplementary file 2 [file ed0e8538ff599d96d3b935ac.docx]

**Table 2S.** Relationship Between Postoperative Arm Morbidity and Physiotherapy Utilization

| Arm morbidity status | Received PT n (%) | No PT n (%) | Total |
| --- | --- | --- | --- |
| No morbidity (n=611) | 99 (16.2%) | 512 (83.8%) | 611 |
| Morbidity present (n=978) | 670 (68.5%) | 308 (31.5%) | 978 |
| Total | 769 (48.4%) | 820 (51.6%) | 1589 |

*Abbreviations:* PT – physiotherapy

*Notes:* Percentages represent row proportions within each morbidity category. Upper-limb morbidity was defined across four clinically relevant domains: (1) pain, measured using a Numerical Rating Scale (0–10), with >1 considered clinically meaningful postoperative pain; (2) range of motion (ROM) limitation, defined as self-reported inability to achieve full overhead arm elevation; (3) functional impairment, defined as a QuickDASH score ≥20; and (4) lymphedema, diagnosed clinically by a physician or physical therapist. A participant was categorized as having morbidity if at least one domain met criterion.
